# Supplementary material
Source: PubMed Central journal article supplement (PMC3137518)

Supplementary Figure 1

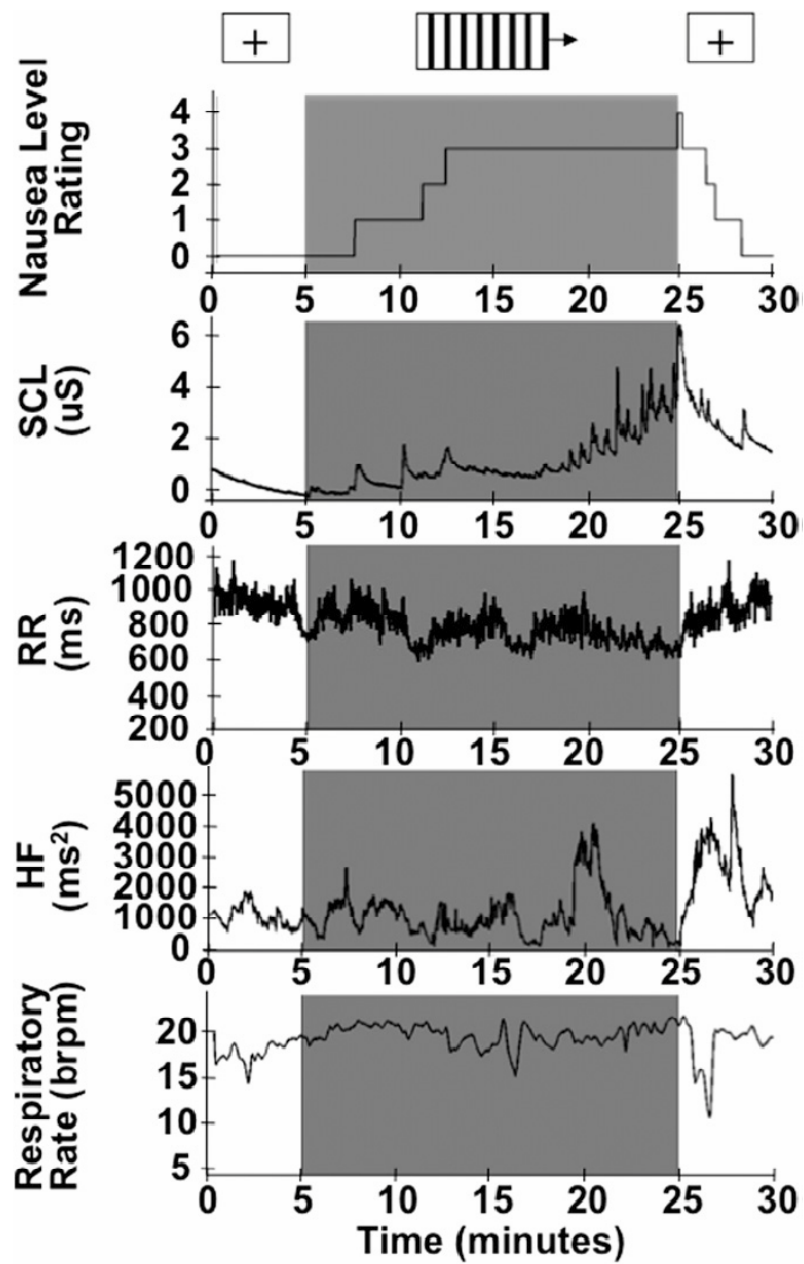

Supplement: NIHMS302670-supplement-1.pdf [file NIHMS302670-supplement-1.pdf]
